# Supplementary material for: Cdh5-lineage–independent origin of dermal lymphatics shown by temporally restricted lineage tracing
Source: Life Sci Alliance. 2022 Aug 12;5(11):e202201561. doi: 10.26508/lsa.202201561 (PMC9375154; doi:10.26508/lsa.202201561)
Supplement: Supplementary file 1 [file LSA-2022-01561_SdataF1.xlsx]

## Sheet: Figure 1D
Tam at E9.5, FACS E14.5
					BEC							LEC
Embryo ID	Female	Cdh5-CreERT2	rosa	skin region	% BEC	# BEC	% BEC tom+	% BEC tom-				% LEC	# LEC	% LEC tom+	% LEC tom-
2	63448	+	tom/+	cervical	90.9	1064	97	3	94.94	avr		7.95	93	88.2	11.8	79.38	avr
3	63448	+	tom/+	cervical	92.8	1727	91	9	4.44725	sd		6.08	113	48.7	51.3	18.6817	sd
4	63447	+	tom/+	cervical	93.8	2458	97.9	2.1	1.98887	sem		5.27	138	89.9	10.1	8.35472	sem
5	63447	+	tom/+	cervical	92.1	2005	99.4	0.6				6.57	143	95.1	4.9
2	65284	+	tom/+	cervical	89.3	1440	89.4	10.6				9.09	164	75	25
1	65284	wt	tom/+	cervical	81.5	1064	0	100				16.4	214	0	100
1	63448	wt	tom/+	cervical	92.1	2344	0.043	100				6.6	168	0	100
2	63448	+	tom/+	lumbar	89.8	3872	94.7	5.3	95.2	avr		9.12	393	67.2	32.8	55.62	avr
3	63448	+	tom/+	lumbar	91.3	2701	90.5	9.5	3.27414	sd		7.51	222	26.1	73.9	18.1168	sd
4	63447	+	tom/+	lumbar	92.6	4406	97.9	2.1	1.46424	sem		6.14	292	57.5	42.5	8.10206	sem
5	63447	+	tom/+	lumbar	93.3	4710	98.7	1.3				5.8	293	73	27
2	65284	+	tom/+	lumbar	93.5	759	94.2	5.8				5.67	46	54.3	45.7
1	65284	wt	tom/+	lumbar	88.8	1274	0	100				9.62	138	0	100
1	63448	wt	tom/+	lumbar	93.6	3480	0.17	99.8				5.08	189	0	100

## Sheet: Figure 1E
Tam at E10.5, FACS E14.5
					BEC							LEC
Embryo ID	Female	Cdh5-CreERT2	rosa	skin region	% BEC	# BEC	% BEC tom+	% BEC tom-				% LEC	# LEC	% LEC tom+	% LEC tom-
4	151169	+	tom/+	cervical	85.6	2322	93.7	6.29	95.4667	avr		12	327	83.5	16.5	83.5	avr
5	151169	+	tom/+	cervical	88	3536	96.9	3.08	1.62583	sd		9.78	393	85.2	14.78	2.48797	sd
6	151169	+	tom/+	cervical	82.7	1734	95.8	4.21	0.938675	sem		13.8	289	80.3	19.7	1.43643	sem
7	151169	wt	tom/+	cervical	85.1	1977	0.25	99.7				12.4	289	1.4	98.6
4	151169	+	tom/+	lumbar	83.9	8242	94.4	5.61	94.9333	avr		13.1	1288	76.8	23.2	70.0667	avr
5	151169	+	tom/+	lumbar	88.1	8758	95.5	4.45	0.550757	sd		9.6	955	69.9	30.1	6.65157	sd
6	151169	+	tom/+	lumbar	87.9	4838	94.9	5.08	0.31798	sem		9.15	504	63.5	36.5	3.84028	sem
7	151169	wt	tom/+	lumbar	89.3	4033	0.3	99.7				8.11	366	0.55	99.5
