# Supplementary material for: Cdh5-lineage–independent origin of dermal lymphatics shown by temporally restricted lineage tracing
Source: Life Sci Alliance. 2022 Aug 12;5(11):e202201561. doi: 10.26508/lsa.202201561 (PMC9375154; doi:10.26508/lsa.202201561)
Supplement: Supplementary file 2 [file LSA-2022-01561_SdataF2.xlsx]

## Sheet: Figure 2C
4-OHT at E9.5, FACS E14.5
					BEC							LEC
Embryo ID	Female	Cdh5-CreERT2	rosa	skin region	% BEC	# BEC	% BEC tom+	% BEC tom-				% LEC	# LEC	% LEC tom+	% LEC tom-
1	61454	+	tom/+	cervical	92.6	1550	57.2	42.8	78.2375	avr		5.86	98	11.2	88.8	25.925	avr
2	61454	+	tom/+	cervical	89.5	3128	89.5	10.5	10.1752	sd		7.1	248	28.6	71.4	9.35914	sd
3	61454	+	tom/+	cervical	91.6	2379	74.9	25.1	3.59747	sem		5.66	147	12.2	87.8	3.30896	sem
1	73342	+	tom/+	cervical	89.4	1738	84.8	15.2				7.61	148	25.7	74.3
1	75120	+	tom/+	cervical	86.7	1048	87.8	12.2				10.9	132	34.1	65.9
2	75120	+	tom/+	cervical	85.8	2217	75.6	24.4				10.5	272	30.5	69.5
3	75119	+	tom/+	cervical	89.3	2103	76.9	23.1				9.08	214	29	71
4	75119	+	tom/+	cervical	88	1421	79.2	20.8				10.5	169	36.1	63.9
4	61454	wt	tom/+	cervical	92.6	2297	0	100				6.17	153	0	100
5	61454	wt	tom/+	cervical	92	3923	0.051	99.9				7.67	327	0	100
6	61454	wt	tom/+	cervical	93.3	2274	0.044	100				6.2	151	0	100
2	73342	wt	tom/+	cervical	89.4	872	0	100				9.03	88	0	100
5	75119	wt	tom/+	cervical	92.5	2061	0.15	99.9				6.1	136	0	100
1	61454	+	tom/+	lumbar	93.6	2957	61.7	38.3	80.0125	avr		5.41	171	2.92	97.1	12.9075	avr
2	61454	+	tom/+	lumbar	93.3	1446	87	13	9.232	sd		4.84	75	5.33	94.7	7.83639	sd
3	61454	+	tom/+	lumbar	92.3	2310	84.3	15.7	3.264	sem		6.35	159	8.81	91.2	2.77058	sem
1	73342	+	tom/+	lumbar	91.4	2377	84.5	15.5				6.88	179	12.3	87.7
1	75120	+	tom/+	lumbar	92.4	2570	88.9	11.1				5.61	156	24.4	75.6
2	75120	+	tom/+	lumbar	88.6	3735	71	29				8.47	357	23.8	76.2
3	75119	+	tom/+	lumbar	92.4	4039	79.1	20.9				6.36	278	14.4	85.6
4	75119	+	tom/+	lumbar	89.4	1915	83.6	16.4				9.53	204	11.3	88.7
4	61454	wt	tom/+	lumbar	94.2	3169	0.032	100				5.29	178	0	100
5	61454	wt	tom/+	lumbar	95.7	4658	0.021	100				3.86	188	0	100
6	61454	wt	tom/+	lumbar	93.7	4094	0.15	99.9				5.08	222	3.6	96.4
2	73342	wt	tom/+	lumbar	91.4	2555	0.078	99.9				6.55	183	0.55	99.5
5	75119	wt	tom/+	lumbar	93.4	2179	0.14	99.9				5.4	126	0	100

## Sheet: Figure 2E
4-OHT at E11.5, FACS E14.5
					BEC							LEC
Embryo ID	Female	Cdh5-CreERT2	rosa	skin region	% BEC	# BEC	% BEC tom+	% BEC tom-				% LEC	# LEC	% LEC tom+	% LEC tom-
1	75118	+	tom/+	cervical	87.3	445	96.2	3.82	95.9667	avr		10.6	54	96.3	3.7	92.8333	avr
2	75118	+	tom/+	cervical	86.9	762	95.7	4.33	0.251661	sd		7.87	69	91.3	8.7	3.00888	sd
3	75118	+	tom/+	cervical	87.3	744	96	4.03	0.145297	sem		9.04	77	90.9	9.09	1.73718	sem
4	75118	wt	tom/+	cervical	90.7	771	0	100				8	68	1.47	98.5
1	75118	+	tom/+	lumbar	90.7	1715	95	5.01	94.0667	avr		7.3	138	89.1	10.9	81.8667	avr
2	75118	+	tom/+	lumbar	90.1	1670	92.6	7.43	1.28582	sd		7.87	146	71.9	28.1	8.91983	sd
3	75118	+	tom/+	lumbar	90.1	1397	94.6	5.37	0.742369	sem		7.54	117	84.6	15.4	5.14987	sem
4	75118	wt	tom/+	lumbar	90.9	746	0	100				8.65	71	1.41	98.6
